# Supplementary material
Source: HighWire-hosted journal article supplement (https://www.annfammed.org/highwire/filestream/7768/field_highwire_adjunct_files/5/Jaen_SuppApp5.pdf)
Supplement: Jaen_SuppApp5.pdf [file Jaen_SuppApp5.pdf]

**Online Supplementary Material**

Jaén CR, Crabtree BF, Palmer R, et al. Methods for evaluating practice change toward a patient-centered medical home. *Ann Fam Med*. 2010;8(Suppl 1):S9-S20.

[http://www.annfammed.org/cgi/content/full/8/Suppl\\_1/S9/DC1](http://www.annfammed.org/cgi/content/full/8/Suppl_1/S9/DC1)

---

**Supplemental Appendix 5. Financial Survey**

The appendix begins on the next page.

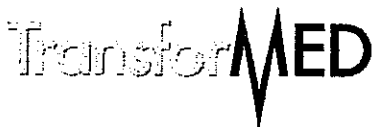

# Financial Survey

**Q1**      **Date:**

**Q2**      **Practice Name:**

**Q3**      **Name of Person Completing Survey:**

**Q4**      **Which of the following best describes the profitability of your practice during the most recent 12 months?**

- A. The practice made a substantial profit.
- B. The practice made a small profit.
- C. The practice broke even.
- D. The practice had a slight loss.
- E. The practice had a significant loss.
- F. I don't have details.

If choice "F" was selected, please explain .....

**Q5**      **Which of the following statements best describes your concern about the long term financial condition of your practice?**

- No concern for the foreseeable future.
- Slight concern.
- Major concern.

If choices "B" or "C" were selected, please explain.....

**Q6**      **During the most recent 12 months have any paychecks been delayed or eliminated for any practice staff, including clinicians, due to financial constraints on the practice?**

- Yes
- No

**Q7**      **During the most recent 12 months have any physicians received less than expected monthly income?**

- Yes
- No

**Q8** During the most recent 12 months have any vendor payments been postponed due to cash flow concerns?

- Yes
- No

**Q9** Have any clinicians left or joined the practice during the last 12 months?

- Yes
- No

If yes, please specify how many, whether they left or joined, and which type of clinician.....

**Q10** Which of the following financial statements and reports are available and reviewed by management at the practice level on a monthly basis? Check all that apply.

- A. Income Statement.
- B. Balance Sheet.
- C. Cash Flow Statement.
- D. Patient volume by clinician.
- E. Net revenue per patient, per clinician.
- F. Accounts Receivable Aging Report.
- G. Other clinician productivity reports.

If choice "G" was selected, please describe.....

**Q11** When was the last time your practice gave most of your staff members a raise (for any reason)?

- A. This year.
- B. Last year.
- C. Before last year.
- D. Not sure.

If choice "D" was selected, please explain .....

**Q12** In the past 12 months, has your practice: (Check all that apply)

- Delayed capital expenditures.
- Invested in new capital expenditures.
- Taken on new debt for capital expenditures.
- Taken on new debt to cover operational expenses.
- None of the above.
- Don't Know.

**Q13 Please select all planning tools that are used in your practice.**

- Strategic Plan with mission and vision statements.*
- Annual Business Plan with monthly budget.*
- Formal cost/benefit analysis for any major additions including staffing, equipment and ancillary services.*
- Other.*

Please specify "Other".....

**Q14 Does your practice have internal control policies and procedures in place to detect the possibility of embezzlement?**

- Yes*
- No*

**Please provide your best estimate of current staffing. (FTE= Full Time Equivalent).**

**Q15 Total Physicians FTE's**

**Q16 Total Nurse Practitioners FTE's**

**Q17 Total Physicians Assistants FTE's**

**Q18 Total other Staff FTE's**

**Q19 Please give your best estimate on the monthly average of patient visits for the practice during the last 12 months?**

**Q20 Please give your best estimate on the average monthly gross revenue for the practice? (In US Dollars\$; example \$2,000,000.00)**

**Q21 Please give your best estimate on the Average monthly pay roll? This includes all physicians and all staff. (In US Dollars\$; example \$2,000,000.00)**

**Q22 Please give your best estimate on the OTHER (not payroll) monthly expenses (e.g. rent or mortgage, phone, utilities, supplies, maintenance, fees, etc.)? (In US Dollars \$)**

**Please give your best estimate on the following:**

**Q23 Average annual Physician salaries. (In US Dollars \$)**

**Q24 Average annual Nurse Practitioner salaries. (In US Dollars \$)**

**Q25 Average annual Physician Assistant salaries. (In US Dollars \$)**

**Q26 Which of the following describes the current ownership of your practice?**

- Physician owned; sole proprietor.*
- Physician owned; medical group.*
- Hospital owned.*
- Other.*

If "Other" please describe.....

**Thank you for taking the time to complete this survey. Your answers are considered confidential data. When you have completed the survey, please return it in the stamped, pre-addressed envelope provided.**
